# Supplementary material for: Correlation of Serum Acylcarnitines with Clinical Presentation and Severity of Coronary Artery Disease
Source: MDPI journal article supplement (doi:10.3390/biom12030354), 2022-02-23
Supplement: s1 [file biomolecules-1520405-supplementary.pdf › biomolecules-1520405-supplementary.pdf]

# Supplementary material

## Correlation of Serum Acylcarnitines with clinical presentation and severity of Coronary Artery Disease

**Olga Deda<sup>†1,2\*</sup>, Eleftherios Panteris<sup>†1,2\*</sup>, Thomas Meikopoulos<sup>2,3</sup>, Olga Begou<sup>2,3</sup>, Thomai Mouskeftara<sup>1,2</sup>, Efstratios Karagiannidis<sup>4</sup>, Andreas S. Papazoglou<sup>4</sup>, Georgios Sianos<sup>4</sup>, Georgios Theodoridis<sup>2,3</sup>, Helen Gika<sup>1,2\*</sup>**

<sup>1</sup>Laboratory of Forensic Medicine and Toxicology, School of Medicine, Aristotle University of Thessaloniki, 54124, Thessaloniki, Greece

oliadmy@gmail.com, eleftherios.panteris@gmail.com, gkikae@auth.gr

<sup>2</sup>Biomic\_AUTH, CIRI-AUTH Center for Interdisciplinary Research and Innovation Aristotle University of Thessaloniki, 57001, Thessaloniki, Greece

thomas\_meik@hotmail.com, olina\_18@hotmail.com, mouskeftara32@gmail.com, gtheodor@chem.auth.gr

<sup>3</sup>Laboratory of Analytical Chemistry, Department of Chemistry, Aristotle University of Thessaloniki, Thessaloniki, Greece

<sup>4</sup>First Department of Cardiology, AHEPA University Hospital, Aristotle University of Thessaloniki, St. Kiriakidi 1, 54636, Thessaloniki, Greece

stratoskarag@gmail.com, anpapazoglou@yahoo.com, gsianos@auth.gr

<sup>†</sup>Equal contribution

\*Correspondence: oliadmy@gmail.com (O.D.); eleftherios.panteris@gmail.com (E.P), gkikae@auth.gr (H.G.)

**Table S1.** Median values (µg/L) of all measured acylcarnitines and 95% CIs for ACS and CCS patients. Statistically significant analogues are shown in bold.

|       | CCS           |              |               | ACS          |              |              | Mann-Whitney U test |
|-------|---------------|--------------|---------------|--------------|--------------|--------------|---------------------|
|       | Median        | ↓95.0% CIs   | ↑95.0% CIs    | Median       | ↓95.0% CIs   | ↑95.0% CIs   | p                   |
| C2    | 2,970.44      | 2,846.84     | 3,111.70      | 2,933.31     | 2,761.05     | 3,059.40     | 0.949               |
| C3    | 176.75        | 169.34       | 185.38        | 175.42       | 166.99       | 181.98       | 0.608               |
| C4    | 38.65         | 36.74        | 41.17         | 38.76        | 36.31        | 40.90        | 0.736               |
| C5    | 25.71         | 24.95        | 27.50         | 26.41        | 25.16        | 28.32        | 0.251               |
| C6    | 29.98         | 28.79        | 31.46         | 28.51        | 26.86        | 29.77        | 0.265               |
| C8    | <b>63.06</b>  | <b>58.68</b> | <b>68.55</b>  | <b>54.75</b> | <b>51.21</b> | <b>57.68</b> | <b>0.012</b>        |
| C10   | <b>106.12</b> | <b>96.74</b> | <b>116.37</b> | <b>88.51</b> | <b>83.51</b> | <b>93.92</b> | <b>0.007</b>        |
| C12   | 29.89         | 28.30        | 31.39         | 27.76        | 25.20        | 29.04        | 0.072               |
| C14   | 19.23         | 18.51        | 19.79         | 17.98        | 17.25        | 19.01        | 0.061               |
| C16   | <b>63.21</b>  | <b>60.85</b> | <b>65.63</b>  | <b>59.97</b> | <b>57.66</b> | <b>61.97</b> | <b>0.018</b>        |
| C18   | 19.01         | 18.35        | 19.52         | 18.27        | 17.63        | 18.84        | 0.060               |
| C18:1 | <b>92.54</b>  | <b>88.15</b> | <b>97.76</b>  | <b>84.43</b> | <b>80.05</b> | <b>89.91</b> | <b>0.011</b>        |
| C18:2 | <b>60.22</b>  | <b>57.89</b> | <b>63.29</b>  | <b>51.89</b> | <b>50.44</b> | <b>54.67</b> | <b>&lt;0.001</b>    |

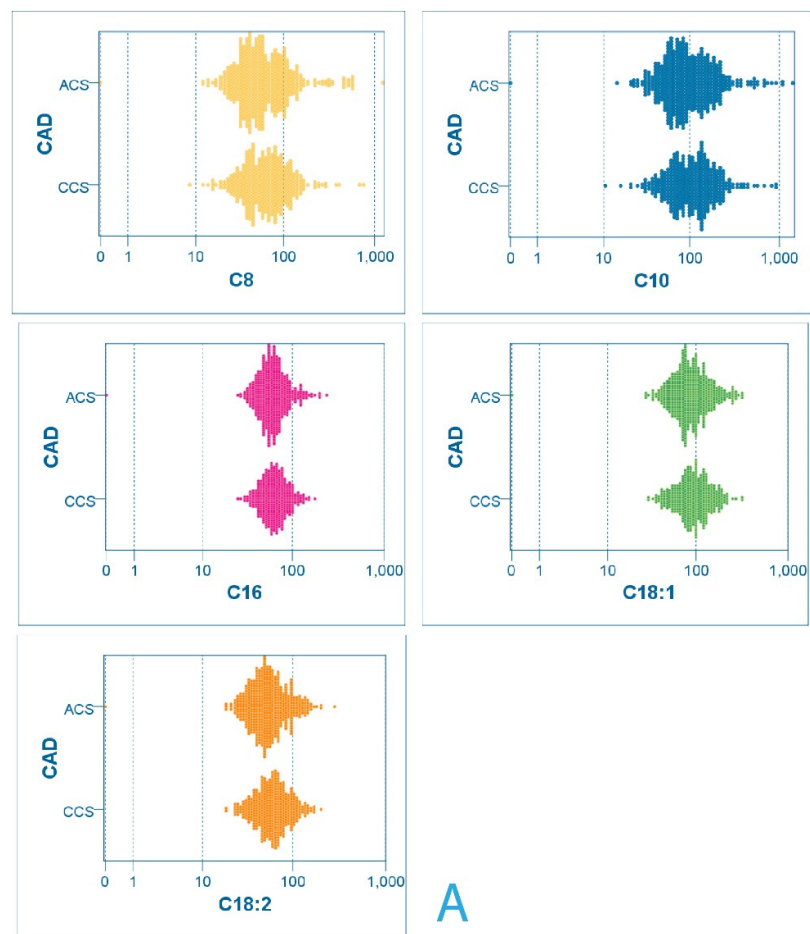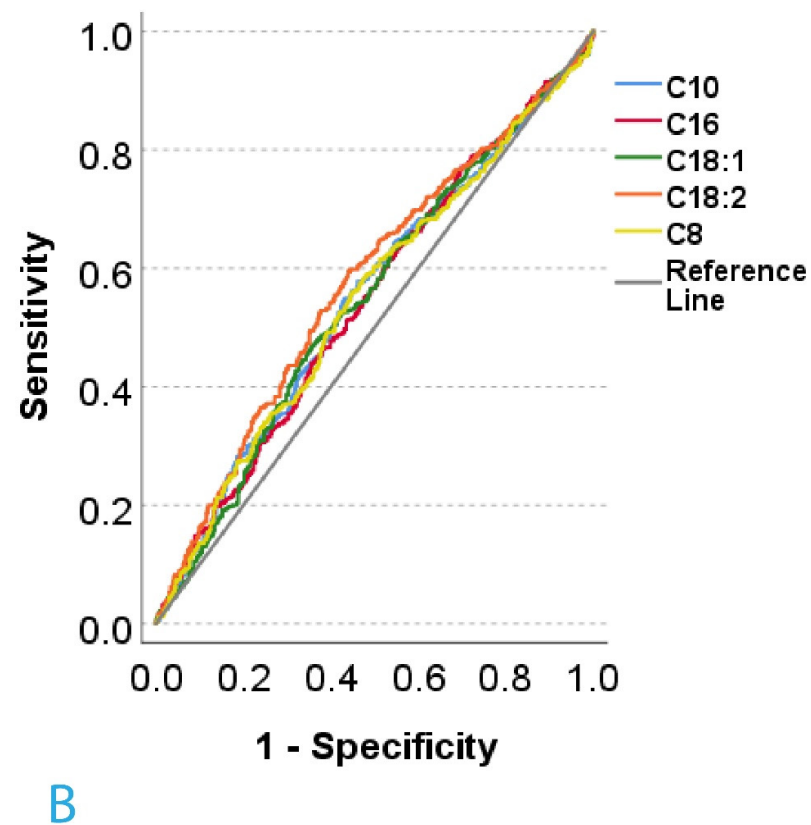

**Figure S1.** A) ACS *vs* CCS, log scaled box-plots of C8, C10, C16, C18.1 and C18.2 levels distribution and B) their respective ROC curves. Acylcarnitine C18.2 presented the highest, yet weak, discriminatory power AUC=0.576 (95% CI 0.539–0.612,  $p < 0.001$ ).

**Table S2.** Diabetes Mellitus (DM) ROC areas for acylcarnitine C2, C3, C4 and C8.

| Area Under the ROC Curve              |              |                         |                              |                                     |              |
|---------------------------------------|--------------|-------------------------|------------------------------|-------------------------------------|--------------|
| Test Result Variable(s)               | Area         | Std. Error <sup>a</sup> | Asymptotic Sig. <sup>b</sup> | Asymptotic 95% Confidence Intervals |              |
|                                       |              |                         |                              | ↓95.0% CIs                          | ↑95.0% CIs   |
| <b>C2</b>                             | <b>0.591</b> | <b>0.019</b>            | <b>0.000</b>                 | <b>0.553</b>                        | <b>0.629</b> |
| C3                                    | 0.576        | 0.019                   | 0.000                        | 0.538                               | 0.614        |
| C4                                    | 0.544        | 0.020                   | 0.029                        | 0.505                               | 0.583        |
| C8                                    | 0.541        | 0.020                   | 0.040                        | 0.502                               | 0.580        |
| a. Under the nonparametric assumption |              |                         |                              |                                     |              |
| b. Null hypothesis: true area = 0.5   |              |                         |                              |                                     |              |

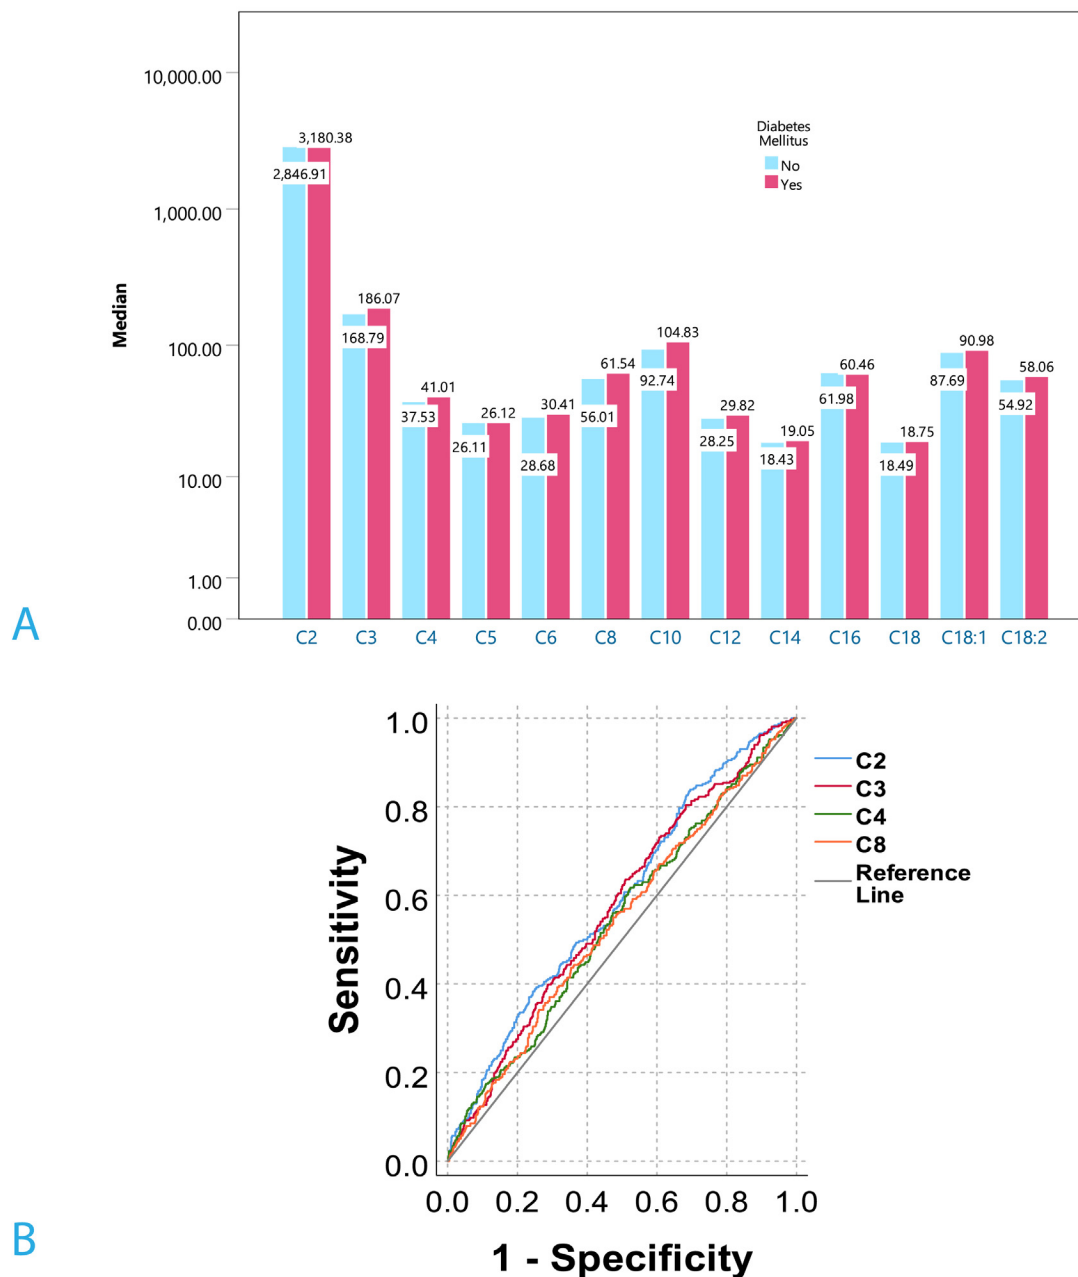

**Figure S2.** A) Log scaled bar graph for acylcarnitine median levels of DM and non-DM patients and B) ROC curves for C2, C3, C4, C8. Acylcarnitine C2 has the highest discriminatory power.

**Table S3.** Diabetes Mellitus (DM) ROC areas for acylcarnitines C2, C3, C4 and C8.

| Area Under the ROC Curve              |       |                         |                              |                                     |            |
|---------------------------------------|-------|-------------------------|------------------------------|-------------------------------------|------------|
| Test Result Variable(s)               | Area  | Std. Error <sup>a</sup> | Asymptotic Sig. <sup>b</sup> | Asymptotic 95% Confidence Intervals |            |
|                                       |       |                         |                              | ↓95.0% CIs                          | ↑95.0% CIs |
| C2                                    | 0.591 | 0.019                   | 0.000                        | 0.553                               | 0.629      |
| C3                                    | 0.576 | 0.019                   | 0.000                        | 0.538                               | 0.614      |
| C4                                    | 0.544 | 0.020                   | 0.029                        | 0.505                               | 0.583      |
| C8                                    | 0.541 | 0.020                   | 0.040                        | 0.502                               | 0.580      |
| a. Under the nonparametric assumption |       |                         |                              |                                     |            |
| b. Null hypothesis: true area = 0.5   |       |                         |                              |                                     |            |



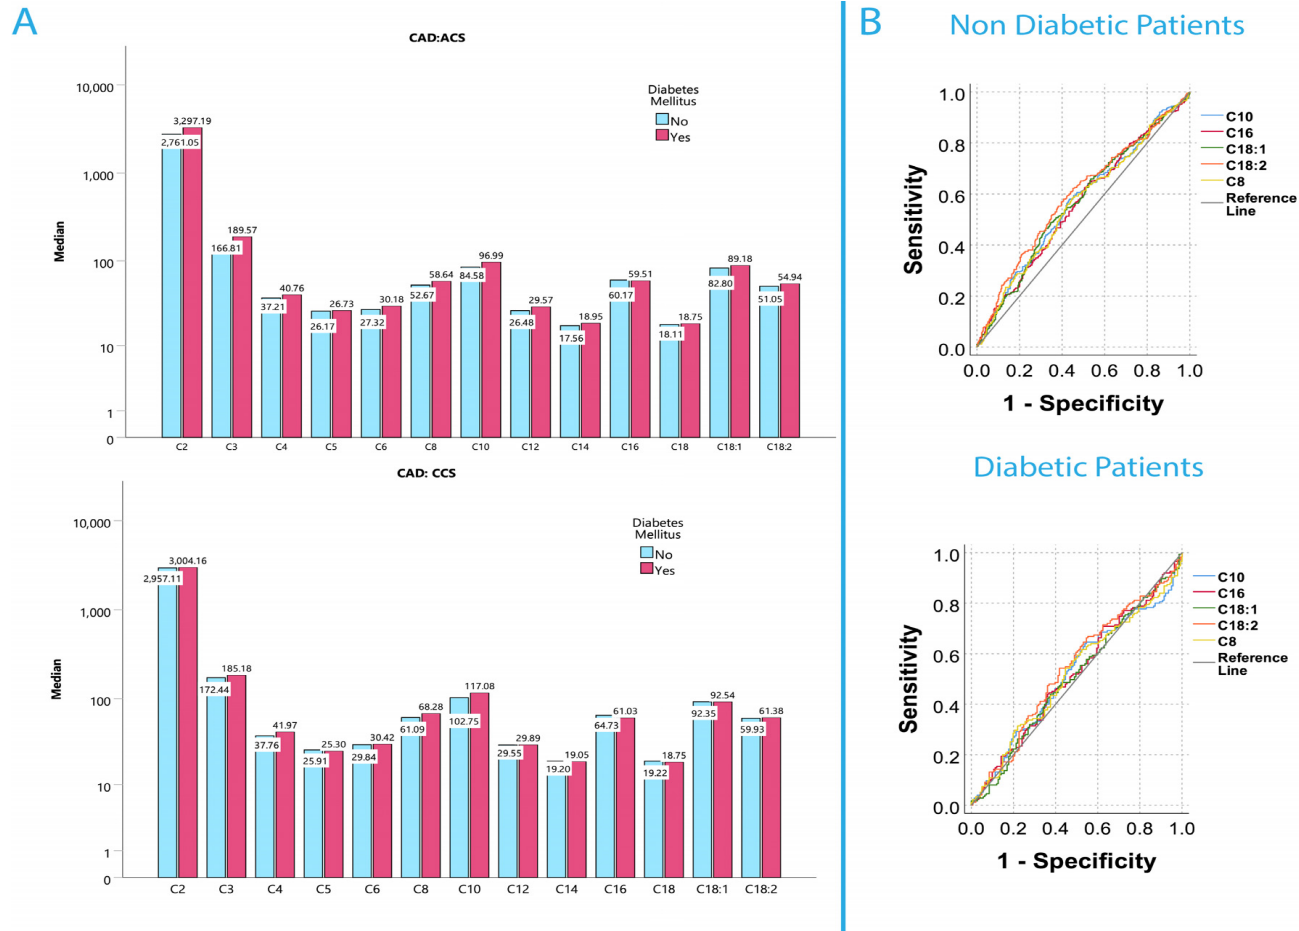

**Figure S3.** A) Log scaled bar graphs for acylcarnitine median levels for both ACS and CCS, DM and non-DM patients and B) ROC analysis of C8, C10, C16, C18.1 and C18.2 showed that for non-diabetics, AUCs were improved especially for C18.2.



**Table S5.** Acylarnitine levels (µg/ L) for CAD groups

| CAD Groups |        |              |              |               | Kruskal Wallis |
|------------|--------|--------------|--------------|---------------|----------------|
|            |        | Median       | ↓95.0% CIs   | ↑95.0% CIs    | p value*       |
| C2         | NSTEMI | 2,906.50     | 2,649.44     | 3,154.25      | 0.219          |
|            | STEMI  | 2,770.56     | 2,539.30     | 3,045.37      |                |
|            | UA     | 3,147.27     | 2,839.91     | 3,452.40      |                |
|            | SA     | 2,969.54     | 2,846.84     | 3,111.70      |                |
| C3         | NSTEMI | 168.35       | 151.99       | 182.39        | 0.824          |
|            | STEMI  | 173.55       | 157.15       | 191.74        |                |
|            | UA     | 181.15       | 167.93       | 196.96        |                |
|            | SA     | 176.80       | 169.84       | 185.38        |                |
| C4         | NSTEMI | 39.92        | 36.20        | 44.81         | 0.782          |
|            | STEMI  | 38.10        | 35.60        | 42.41         |                |
|            | UA     | 37.99        | 34.83        | 43.02         |                |
|            | SA     | 38.62        | 36.74        | 40.81         |                |
| C5         | NSTEMI | 24.79        | 23.46        | 28.80         | 0.026          |
|            | STEMI  | <b>29.08</b> | <b>26.36</b> | <b>30.73</b>  |                |
|            | UA     | <b>25.13</b> | <b>22.86</b> | <b>27.70</b>  |                |
|            | SA     | 25.72        | 24.95        | 27.50         |                |
| C6         | NSTEMI | 27.46        | 25.83        | 31.00         | 0.329          |
|            | STEMI  | 27.58        | 25.65        | 29.10         |                |
|            | UA     | 30.69        | 27.77        | 33.83         |                |
|            | SA     | 29.98        | 28.87        | 31.46         |                |
| C8         | NSTEMI | 54.66        | 49.00        | 60.09         | 0.053          |
|            | STEMI  | 52.99        | 49.11        | 58.13         |                |
|            | UA     | 56.60        | 51.90        | 66.67         |                |
|            | SA     | 63.06        | 58.68        | 68.55         |                |
| C10        | NSTEMI | 89.88        | 78.25        | 105.42        | 0.019          |
|            | STEMI  | <b>86.53</b> | <b>79.36</b> | <b>94.45</b>  |                |
|            | UA     | <b>91.50</b> | <b>83.49</b> | <b>110.42</b> |                |
|            | SA     | 106.09       | 96.74        | 116.37        |                |
| C12        | NSTEMI | 26.54        | 23.70        | 30.20         | 0.377          |
|            | STEMI  | 27.96        | 25.11        | 29.83         |                |
|            | UA     | 29.17        | 24.86        | 31.54         |                |
|            | SA     | 29.88        | 28.26        | 31.39         |                |
| C14        | NSTEMI | 17.51        | 16.27        | 19.55         | 0.301          |
|            | STEMI  | 17.78        | 17.04        | 18.86         |                |
|            | UA     | 19.28        | 17.52        | 20.69         |                |
|            | SA     | 19.17        | 18.43        | 19.79         |                |
| C16        | NSTEMI | 58.38        | 55.03        | 63.64         | 0.012          |
|            | STEMI  | <b>58.29</b> | <b>55.82</b> | <b>60.89</b>  |                |
|            | SA     | <b>63.21</b> | <b>60.85</b> | <b>65.63</b>  |                |
|            | UA     | 62.90        | 60.82        | 66.52         |                |
| C18        | NSTEMI | 17.35        | 16.09        | 18.35         | 0.137          |
|            | STEMI  | 18.63        | 17.76        | 19.54         |                |
|            | UA     | 18.63        | 17.49        | 19.29         |                |
|            | SA     | 19.01        | 18.45        | 19.59         |                |
| C18:1      | NSTEMI | 85.82        | 78.64        | 94.91         | 0.013          |
|            | STEMI  | <b>82.80</b> | <b>76.43</b> | <b>88.61</b>  |                |
|            | SA     | <b>92.53</b> | <b>88.15</b> | <b>97.76</b>  |                |
|            | UA     | 91.30        | 79.31        | 97.06         |                |
| C18:2      | NSTEMI | 54.86        | 50.74        | 59.54         | <0.001         |
|            | STEMI  | <b>50.26</b> | <b>47.34</b> | <b>52.41</b>  |                |
|            | SA     | <b>60.21</b> | <b>57.89</b> | <b>63.29</b>  |                |
|            | UA     | 53.75        | 50.00        | 60.48         |                |

\* Bonferroni corrected

**Table S6.** Acylcarnitines levels (µg/L) and Syntax Score groups.

| Syntax Groups |          | Median   | ↓95.0% CIs | ↑95.0% CIs | Kruskal Wallis (Pair) p value |
|---------------|----------|----------|------------|------------|-------------------------------|
| C2            | 0 (a)    | 3,013    | 2,848.26   | 3,146.54   | NS                            |
|               | 1-22 (b) | 2,841    | 2,652.45   | 3,047.79   | NS                            |
|               | >22 (c)  | 2,951.55 | 2,798.57   | 3,325.86   | NS                            |
| C3            | 0 (a)    | 171.49   | 162.86     | 179.56     | NS                            |
|               | 1-22 (b) | 175.68   | 167.86     | 184.94     | NS                            |
|               | >22 (c)  | 186.56   | 170.45     | 209.04     | NS                            |
| C4            | 0 (a)    | 36.96    | 34.21      | 40.46      | (a-c) 0.002                   |
|               | 1-22 (b) | 37.95    | 35.60      | 40.18      | (b-c) 0.005                   |
|               | >22 (c)  | 45.16    | 38.94      | 49.61      |                               |
| C5            | 0 (a)    | 25.25    | 23.99      | 26.36      | (a-c) 0.024                   |
|               | 1-22 (b) | 26.41    | 24.95      | 28.63      |                               |
|               | >22 (c)  | 27.82    | 25.34      | 30.79      |                               |
| C6            | 0 (a)    | 29.81    | 28.07      | 33.04      | NS                            |
|               | 1-22 (b) | 28.89    | 27.63      | 30.08      | NS                            |
|               | >22 (c)  | 28.88    | 27.10      | 31.34      | NS                            |
| C8            | 0 (a)    | 60.09    | 56.03      | 66.36      | NS                            |
|               | 1-22 (b) | 57.65    | 53.41      | 61.45      | NS                            |
|               | >22 (c)  | 55.13    | 49.58      | 62.70      | NS                            |
| C10           | 0 (a)    | 99.63    | 90.03      | 109.52     | NS                            |
|               | 1-22 (b) | 94.48    | 86.47      | 101.15     | NS                            |
|               | >22 (c)  | 92.32    | 80.54      | 104.81     | NS                            |
| C12           | 0 (a)    | 29.55    | 27.41      | 31.17      | NS                            |
|               | 1-22 (b) | 28.53    | 26.63      | 30.33      | NS                            |
|               | >22 (c)  | 27.73    | 25.11      | 29.71      | NS                            |
| C14           | 0 (a)    | 19.24    | 18.12      | 20.36      | NS                            |
|               | 1-22 (b) | 18.54    | 17.59      | 19.27      | NS                            |
|               | >22 (c)  | 18.21    | 17.06      | 19.69      | NS                            |
| C16           | 0 (a)    | 65.18    | 62.57      | 67.90      | (c-a) 0.031                   |
|               | 1-22 (b) | 60.28    | 57.95      | 62.48      | (b-a) 0.044                   |
|               | >22 (c)  | 59.27    | 56.28      | 61.94      | NS                            |
| C18           | 0 (a)    | 19.11    | 18.27      | 20.08      | NS                            |
|               | 1-22 (b) | 18.39    | 17.70      | 19.03      | NS                            |
|               | >22 (c)  | 18.18    | 17.50      | 19.08      | NS                            |
| C18:1         | 0 (a)    | 91.70    | 85.27      | 98.82      | NS                            |
|               | 1-22 (b) | 88.03    | 82.80      | 92.55      | NS                            |
|               | >22 (c)  | 87.63    | 80.05      | 93.49      | NS                            |
| C18:2         | 0 (a)    | 60.48    | 56.37      | 64.61      | (c-a) 0.019                   |
|               | 1-22 (b) | 53.83    | 51.35      | 56.62      | (b-a) 0.012                   |
|               | >22 (c)  | 53.28    | 49.37      | 57.57      | NS                            |

NS= non-significant, p > 0.05

**Table S7.** Acylcarnitine levels (μg/L) and SS metrics (Heavy calcification and LVEF%).

| Heavy calcification |           | Median   | ↓95.0% CIs | ↑95.0% CIs | Mann-Whitney P value          |
|---------------------|-----------|----------|------------|------------|-------------------------------|
| C2                  | No        | 2,901.34 | 2,728.44   | 3,017.08   | 0.002                         |
|                     | Yes       | 3,121.71 | 2,933.37   | 3,325.86   |                               |
| C3                  | No        | 169.84   | 165.03     | 176.21     | <0.001                        |
|                     | Yes       | 200.02   | 183.58     | 213.75     |                               |
| C4                  | No        | 36.74    | 35.23      | 38.67      | <0.001                        |
|                     | Yes       | 45.77    | 41.23      | 50.19      |                               |
| C5                  | No        | 25.55    | 24.85      | 26.69      | 0.002                         |
|                     | Yes       | 29.08    | 26.65      | 30.90      |                               |
| C6                  | No        | 28.78    | 27.65      | 29.84      | 0.006                         |
|                     | Yes       | 30.33    | 28.66      | 32.17      |                               |
| C8                  | No        | 57.71    | 54.65      | 60.51      | 0.104                         |
|                     | Yes       | 58.01    | 54.41      | 67.42      |                               |
| C10                 | No        | 93.40    | 86.47      | 100.78     | 0.149                         |
|                     | Yes       | 97.62    | 92.32      | 113.59     |                               |
| C12                 | No        | 28.70    | 27.33      | 29.95      | 0.468                         |
|                     | Yes       | 28.58    | 26.74      | 30.72      |                               |
| C14                 | No        | 18.64    | 17.88      | 19.28      | 0.651                         |
|                     | Yes       | 18.96    | 17.28      | 20.02      |                               |
| C16                 | No        | 62.34    | 60.31      | 64.11      | 0.365                         |
|                     | Yes       | 58.64    | 55.76      | 61.94      |                               |
| C18                 | No        | 18.76    | 18.24      | 19.19      | 0.207                         |
|                     | Yes       | 18.10    | 17.38      | 19.02      |                               |
| C18:1               | No        | 87.65    | 83.89      | 92.22      | 0.327                         |
|                     | Yes       | 91.51    | 85.58      | 97.33      |                               |
| C18:2               | No        | 55.82    | 54.11      | 58.50      | 0.937                         |
|                     | Yes       | 54.23    | 51.18      | 59.94      |                               |
| LVEF groups         |           | Median   | ↓95.0% CIs | ↑95.0% CIs | Kruskal Wallis (Pair) P value |
| C2                  | <40 (a)   | 3,255.34 | 3,022.59   | 4,185.32   | (b-c) 0.006                   |
|                     | 40-49 (b) | 2,639.96 | 2,416.06   | 3,044.11   | (a-c) 0.002                   |
|                     | >50 (c)   | 2,905.99 | 2,700.97   | 3,021.90   |                               |
| C3                  | <40 (a)   | 206.90   | 175.46     | 243.44     | (a-c) 0.001                   |
|                     | 40-49 (b) | 174.62   | 157.34     | 206.79     |                               |
|                     | >50 (c)   | 171.25   | 165.03     | 178.98     | (b-c) 0.006                   |
| C4                  | <40 (a)   | 52.70    | 39.71      | 58.60      | (a-c) 0.001                   |
|                     | 40-49 (b) | 41.15    | 36.35      | 49.85      |                               |
|                     | >50 (c)   | 36.60    | 34.83      | 38.94      |                               |
| C5                  | <40 (a)   | 29.47    | 25.09      | 37.60      | (b-c) 0.025                   |
|                     | 40-49 (b) | 28.92    | 25.43      | 31.66      | (a-c) 0.006                   |
|                     | >50 (c)   | 25.13    | 24.02      | 26.14      |                               |
| C6                  | <40 (a)   | 34.14    | 30.30      | 43.81      | (a-b) 0.020                   |
|                     | 40-49 (b) | 29.25    | 26.86      | 32.84      | (a-c) <0.001                  |
|                     | >50 (c)   | 27.81    | 26.62      | 29.26      |                               |
| C8                  | <40 (a)   | 59.00    | 50.92      | 73.91      | NS                            |
|                     | 40-49 (b) | 58.15    | 51.21      | 74.69      | NS                            |
|                     | >50 (c)   | 55.22    | 51.17      | 59.64      | NS                            |
| C10                 | <40 (a)   | 95.87    | 80.14      | 121.95     | NS                            |
|                     | 40-49 (b) | 98.47    | 86.44      | 120.75     | NS                            |
|                     | >50 (c)   | 92.34    | 84.57      | 98.89      | NS                            |
| C12                 | <40 (a)   | 29.84    | 24.63      | 35.27      | NS                            |
|                     | 40-49 (b) | 28.44    | 24.46      | 32.16      | NS                            |
|                     | >50 (c)   | 27.55    | 26.17      | 29.02      | NS                            |
| C14                 | <40 (a)   | 19.81    | 17.72      | 21.54      | NS                            |
|                     | 40-49 (b) | 18.05    | 16.75      | 19.55      | NS                            |
|                     | >50 (c)   | 18.39    | 17.43      | 19.14      | NS                            |
| C16                 | <40 (a)   | 57.57    | 54.59      | 68.83      | NS                            |
|                     | 40-49 (b) | 59.20    | 56.10      | 63.27      | NS                            |
|                     | >50 (c)   | 61.33    | 58.85      | 63.55      | NS                            |
| C18                 | <40 (a)   | 17.92    | 17.10      | 19.31      | NS                            |
|                     | 40-49 (b) | 19.03    | 17.06      | 20.45      | NS                            |
|                     | >50 (c)   | 18.22    | 17.63      | 18.76      | NS                            |
| C18:1               | <40 (a)   | 87.09    | 76.43      | 106.84     | NS                            |
|                     | 40-49 (b) | 84.36    | 76.22      | 93.48      | NS                            |
|                     | >50 (c)   | 86.04    | 81.90      | 90.19      | NS                            |
| C18:2               | <40 (a)   | 56.04    | 53.04      | 63.51      | NS                            |
|                     | 40-49 (b) | 55.39    | 50.31      | 60.64      | NS                            |
|                     | >50 (c)   | 53.63    | 50.74      | 57.07      | NS                            |

**Table S8.** Linear regression for Syntax Score.

| Model Summary <sup>a</sup>                                                                          |                    |                             |                        |                            |                         |                 |                                 |                    |               |               |
|-----------------------------------------------------------------------------------------------------|--------------------|-----------------------------|------------------------|----------------------------|-------------------------|-----------------|---------------------------------|--------------------|---------------|---------------|
| Model                                                                                               | R                  | R Square                    | Adjusted R Square      | Std. Error of the Estimate | Change Statistics       |                 |                                 |                    |               | Durbin-Watson |
|                                                                                                     |                    |                             |                        |                            | R Square Change         | F Change        | df1                             | df2                | Sig. F Change |               |
| 1                                                                                                   | 0.404 <sup>a</sup> | 0.164                       | 0.157                  | 12.3377                    | 0.164                   | 25.773          | 7                               | 923                | 0.000         | 1.566         |
| a. Predictors: (Constant), STATIN, Sex, Ratio C4/C18.2, CAD Groups, Diabetes Mellitus, Age, Smoking |                    |                             |                        |                            |                         |                 |                                 |                    |               |               |
| b. Dependent Variable: Syntax Score                                                                 |                    |                             |                        |                            |                         |                 |                                 |                    |               |               |
| Bootstrap for Model Summary                                                                         |                    |                             |                        |                            |                         |                 |                                 |                    |               |               |
| Model                                                                                               | Durbin-Watson      |                             | Bootstrap <sup>a</sup> |                            |                         |                 |                                 |                    |               |               |
|                                                                                                     |                    |                             | Bias                   | Std. Error                 | 95% Confidence Interval |                 |                                 |                    |               |               |
|                                                                                                     |                    |                             |                        |                            | Lower                   |                 | Upper                           |                    |               |               |
| 1                                                                                                   | 1.566              |                             | -0.534                 | 0.063                      | 0.906                   |                 | 1.152                           |                    |               |               |
| a. Unless otherwise noted, bootstrap results are based on 1000 bootstrap samples                    |                    |                             |                        |                            |                         |                 |                                 |                    |               |               |
| ANOVA <sup>a</sup>                                                                                  |                    |                             |                        |                            |                         |                 |                                 |                    |               |               |
| Model                                                                                               |                    | Sum of Squares              |                        | df                         | Mean Square             |                 | F                               | Sig.               |               |               |
| 1                                                                                                   | Regression         |                             | 27,462.184             | 7                          | 3,923.169               |                 | 25.773                          | 0.000 <sup>b</sup> |               |               |
|                                                                                                     | Residual           |                             | 140,499.070            | 923                        | 152.220                 |                 |                                 |                    |               |               |
|                                                                                                     | Total              |                             | 167,961.254            | 930                        |                         |                 |                                 |                    |               |               |
| a. Dependent Variable: Syntax Score                                                                 |                    |                             |                        |                            |                         |                 |                                 |                    |               |               |
| b. Predictors: (Constant), STATIN, Sex, Ratio C4/C18.2, CAD Groups, Diabetes Mellitus, Age, Smoking |                    |                             |                        |                            |                         |                 |                                 |                    |               |               |
| Coefficients <sup>a</sup>                                                                           |                    |                             |                        |                            |                         |                 |                                 |                    |               |               |
| Model                                                                                               |                    | Unstandardized Coefficients |                        | Standardized Coefficients  | t                       | Sig.            | 95.0% Confidence Interval for B |                    |               |               |
|                                                                                                     |                    | B                           | Std. Error             | Beta                       |                         |                 | Lower Bound                     | Upper Bound        |               |               |
| 1                                                                                                   | (Constant)         |                             | 5.432                  | 2.85                       |                         | 1.904           | 0.057                           | -0.168             | 11.032        |               |
|                                                                                                     | Sex                |                             | 2.968                  | 0.950                      | 0.098                   | 3.126           | 0.002                           | 1.105              | 4.832         |               |
|                                                                                                     | Diabetes Mellitus  |                             | 2.056                  | 0.438                      | 0.145                   | 4.689           | 0.000                           | 1.195              | 2.916         |               |
|                                                                                                     | Smoking            |                             | 0.368                  | 0.897                      | 0.014                   | 0.411           | 0.681                           | -1.392             | 2.129         |               |
|                                                                                                     | Age                |                             | 0.156                  | 0.036                      | 0.143                   | 4.356           | 0.000                           | 0.086              | 0.226         |               |
|                                                                                                     | Ratio C4/C18.2     |                             | 2.010                  | 0.473                      | 0.130                   | 4.250           | 0.000                           | 1.082              | 2.938         |               |
|                                                                                                     | CAD Groups         |                             | -3.091                 | 0.357                      | -0.269                  | -8.657          | 0.000                           | -3.791             | -2.390        |               |
| STATIN                                                                                              |                    | 2.192                       | 0.825                  | 0.082                      | 2.656                   | 0.008           | 0.572                           | 3.811              |               |               |
| a. Dependent Variable: Syntax Score                                                                 |                    |                             |                        |                            |                         |                 |                                 |                    |               |               |
| Bootstrap for Coefficients                                                                          |                    |                             |                        |                            |                         |                 |                                 |                    |               |               |
| Model                                                                                               |                    |                             | B                      | Bootstrap <sup>a</sup>     |                         |                 |                                 |                    |               |               |
|                                                                                                     |                    |                             |                        | Bias                       | Std. Error              | Sig. (2-tailed) | 95% Confidence Interval         |                    |               |               |
|                                                                                                     |                    |                             |                        |                            |                         |                 | Lower                           | Upper              |               |               |
| 1                                                                                                   | (Constant)         |                             | 5.432                  | 0.009                      | 2.714                   | 0.038           | 0.308                           | 10.510             |               |               |
|                                                                                                     | Sex                |                             | 2.968                  | -0.004                     | 0.988                   | 0.005           | 1.048                           | 4.883              |               |               |
|                                                                                                     | Diabetes Mellitus  |                             | 2.056                  | 0.002                      | 0.470                   | 0.001           | 1.150                           | 2.978              |               |               |
|                                                                                                     | Smoking            |                             | 0.368                  | -0.062                     | 0.848                   | 0.651           | -1.428                          | 1.985              |               |               |
|                                                                                                     | Age                |                             | 0.156                  | -0.001                     | 0.035                   | 0.001           | 0.087                           | 0.219              |               |               |
|                                                                                                     | Ratio C4/C18.2     |                             | 2.010                  | 0.124                      | 0.613                   | 0.002           | 1.159                           | 3.587              |               |               |
|                                                                                                     | CAD Groups         |                             | -3.091                 | 0.007                      | 0.370                   | 0.001           | -3.803                          | -2.334             |               |               |
| STATIN                                                                                              |                    | 2.192                       | -0.007                 | 0.849                      | 0.011                   | 0.489           | 3.870                           |                    |               |               |
| a. Unless otherwise noted, bootstrap results are based on 1000 bootstrap samples                    |                    |                             |                        |                            |                         |                 |                                 |                    |               |               |

**Table S9.** Acylcarnitine levels ( $\mu\text{g/L}$ ) comparison between CKD and non-CKD patients

|       | CKD patients (N = 127) vs Non CKDN = 818). |            |            |          |            |            |                   |
|-------|--------------------------------------------|------------|------------|----------|------------|------------|-------------------|
|       | Non CKD                                    |            |            | CKD      |            |            | Mann Whitney test |
|       | Median                                     | ↓95.0% CIs | ↑95.0% CIs | Median   | ↓95.0% CIs | ↑95.0% CIs | p value           |
| C2    | 2,800.68                                   | 2,654.27   | 2,924.54   | 4,186.94 | 3,926.20   | 4,584.89   | <0.001            |
| C3    | 169.97                                     | 164.87     | 175.74     | 232.15   | 209.04     | 250.07     | <0.001            |
| C4    | 36.74                                      | 35.30      | 38.39      | 58.42    | 53.10      | 67.68      | <0.001            |
| C5    | 25.55                                      | 24.82      | 26.60      | 35.92    | 30.03      | 40.57      | <0.001            |
| C6    | 27.95                                      | 26.99      | 28.87      | 43.68    | 39.96      | 49.39      | <0.001            |
| C8    | 54.41                                      | 51.75      | 56.90      | 92.21    | 83.67      | 100.58     | <0.001            |
| C10   | 89.64                                      | 83.69      | 94.45      | 153.27   | 137.40     | 171.24     | <0.001            |
| C12   | 27.40                                      | 26.10      | 28.60      | 35.56    | 32.81      | 45.20      | <0.001            |
| C14   | 18.15                                      | 17.41      | 18.85      | 21.87    | 20.46      | 23.82      | <0.001            |
| C16   | 60.43                                      | 58.47      | 62.35      | 66.04    | 61.84      | 73.46      | 0.003             |
| C18   | 18.35                                      | 17.86      | 18.86      | 19.24    | 18.49      | 21.36      | <0.001            |
| C18:1 | 87.22                                      | 83.38      | 90.38      | 97.50    | 91.44      | 105.93     | <0.001            |
| C18:2 | 54.92                                      | 52.75      | 57.07      | 60.04    | 54.99      | 65.12      | 0.016             |

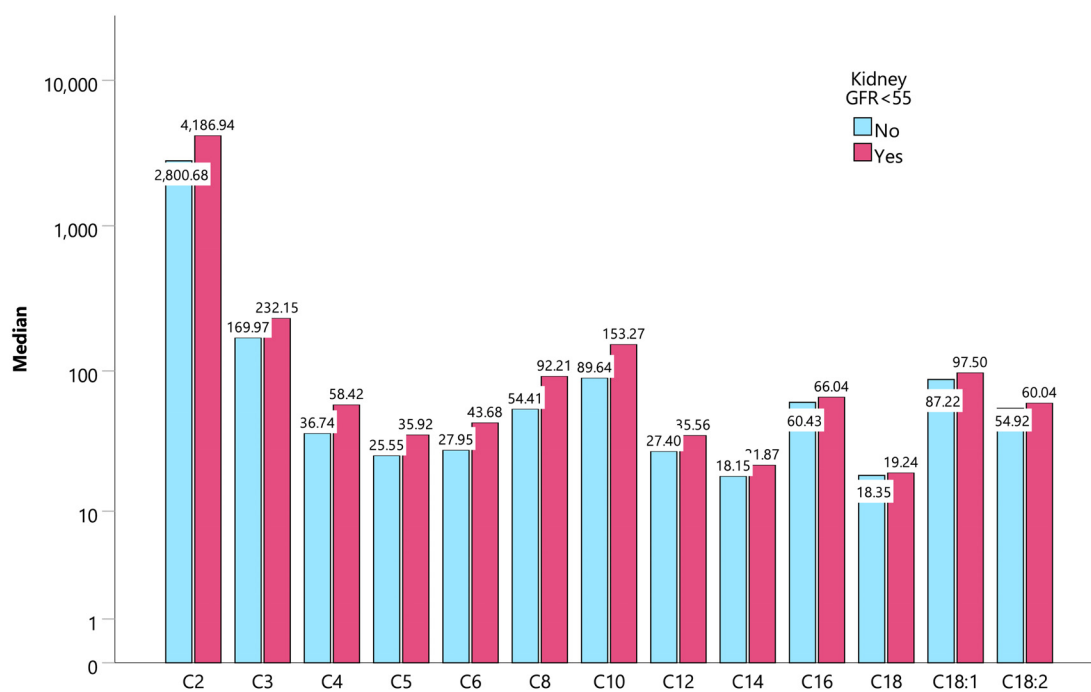

**Figure S4.** ) Log scaled bar graphs of acylcarnitine levels comparison between kidney failure and non-kidney failure patients (GFR<55).
